# Supplementary material for: Beyond conventional: unveiling the impact of Zn anode pretreatment in aqueous zinc-ion batteries
Source: Royal Society of Chemistry journal article supplement (doi:10.1039/d4ta03160a), 2024-01-01
Supplement: d4ta03160a1.pdf [file d4ta03160a1.pdf]

## Supplementary Information

### Beyond Conventional: Unveiling the Impact of Zn Anode Pre-Treatment in Aqueous Zinc Ion Batteries

**Table S1.** Comparison of the electrochemical performances for various pre-treated Zn anodes for ZIBs.

| Methodology                                                                         | Electrolyte                                           | Overpotential                                                      | Life cycle Symmetric cell                                           | Life cycle Full cell                                                                                           | Ref.     |
|-------------------------------------------------------------------------------------|-------------------------------------------------------|--------------------------------------------------------------------|---------------------------------------------------------------------|----------------------------------------------------------------------------------------------------------------|----------|
| Mechanical polishing (One side)                                                     | 3 M ZnSO <sub>4</sub>                                 | 160 mV<br>(1 mA cm <sup>-2</sup> ,<br>1 mA h cm <sup>-2</sup> )    | 400 h<br>(1 mA cm <sup>-2</sup> ,<br>1 mA h cm <sup>-2</sup> )      | 50 cycles, 0.1 A g <sup>-1</sup><br>~53% retention<br>Zn//Mn <sub>2</sub> O <sub>4</sub> ·1.31H <sub>2</sub> O | 1        |
| Mechanical polishing (One side)                                                     | 2 M ZnSO <sub>4</sub>                                 | 18 mV<br>(1 mA cm <sup>-2</sup> ,<br>1 mA h cm <sup>-2</sup> )     | 480 h<br>(1 mA cm <sup>-2</sup> ,<br>1 mA h cm <sup>-2</sup> )      | 20 cycles, - A g <sup>-1</sup><br>~15% retention<br>Zn//VO <sub>2</sub> /CNTs                                  | 2        |
| Mechanical polishing (Both sides)                                                   | 2 M ZnSO <sub>4</sub>                                 | ~70 mV<br>(1 mA cm <sup>-2</sup> ,<br>1 mA h cm <sup>-2</sup> )    | 800 h<br>(1 mA cm <sup>-2</sup> ,<br>1 mA h cm <sup>-2</sup> )      | -                                                                                                              | 3        |
| Electropolishing                                                                    | 2 M ZnSO <sub>4</sub>                                 | 50 mV<br>(1 mA cm <sup>-2</sup> ,<br>25 mA h cm <sup>-2</sup> )    | 380 h<br>(1 mA cm <sup>-2</sup> ,<br>1 mA h cm <sup>-2</sup> )      | 200 cycles, 2 A g <sup>-1</sup><br>~37% retention<br>Zn//VO <sub>2</sub>                                       | 4        |
| Photolithography + Etching                                                          | 3 M Zn(CF <sub>3</sub> SO <sub>3</sub> ) <sub>2</sub> | ~100 mV<br>(1 mA cm <sup>-2</sup> ,<br>1 mA h cm <sup>-2</sup> )   | 500 h<br>(1 mA cm <sup>-2</sup> ,<br>1 mA h cm <sup>-2</sup> )      | 10K cycles, 10 A g <sup>-1</sup><br>~82% retention<br>Zn//PVO                                                  | 5        |
| Chemical treatment (HCl)                                                            | 3 M ZnSO <sub>4</sub>                                 | 20 mV<br>(1 mA cm <sup>-2</sup> ,<br>0.5 mA h cm <sup>-2</sup> )   | 200 h<br>(1 mA cm <sup>-2</sup> ,<br>0.5 mA h cm <sup>-2</sup> )    | -                                                                                                              | 6        |
| Organic acid etching (TFA in AN)                                                    | 1 M ZnSO <sub>4</sub>                                 | ~11 mV<br>(4 mA cm <sup>-2</sup> ,<br>2 mA h cm <sup>-2</sup> )    | 800 h<br>(1 mA cm <sup>-2</sup> ,<br>1 mA h cm <sup>-2</sup> )      | 3000 cycles, 5 A g <sup>-1</sup><br>~40% retention<br>Zn//α-MnO <sub>2</sub>                                   | 7        |
| Chemical treatment (H <sub>3</sub> PO <sub>4</sub> )                                | 2 M Zn(CF <sub>3</sub> SO <sub>3</sub> ) <sub>2</sub> | 60 mV<br>(0.5 mA cm <sup>-2</sup> ,<br>0.1 mA h cm <sup>-2</sup> ) | 1400 h<br>(0.5 mA cm <sup>-2</sup> ,<br>0.1 mA h cm <sup>-2</sup> ) | 500 cycles, 1 A g <sup>-1</sup><br>~90% retention<br>Zn//V <sub>2</sub> O <sub>5</sub>                         | 8        |
| Acid etching (HCl)                                                                  | 2 M ZnSO <sub>4</sub>                                 | 19.5 mV<br>(1 mA cm <sup>-2</sup> ,<br>1 mA h cm <sup>-2</sup> )   | 3000 h<br>(1 mA cm <sup>-2</sup> ,<br>1 mA h cm <sup>-2</sup> )     | 1000 cycles, 5 A g <sup>-1</sup><br>~72% retention<br>Zn//V <sub>2</sub> O <sub>5</sub>                        | 9        |
| Chemical treatment ((NH <sub>4</sub> ) <sub>2</sub> S <sub>2</sub> O <sub>8</sub> ) | 3 M Zn(CF <sub>3</sub> SO <sub>3</sub> ) <sub>2</sub> | ~0 mV<br>(0.1 mA cm <sup>-2</sup> ,<br>0.1 mA h cm <sup>-2</sup> ) | 200 h<br>(0.1 mA cm <sup>-2</sup> ,<br>0.1 mA h cm <sup>-2</sup> )  | 5000 cycles, 5 A g <sup>-1</sup><br>~68% retention<br>Zn//V <sub>2</sub> O <sub>5</sub> .nH <sub>2</sub> O     | Our work |

PVO: polyaniline-intercalated vanadium oxide; TFA: trifluoromethanesulfonic acid; AN: acetonitrile.

# Transmission X-ray Microscopy

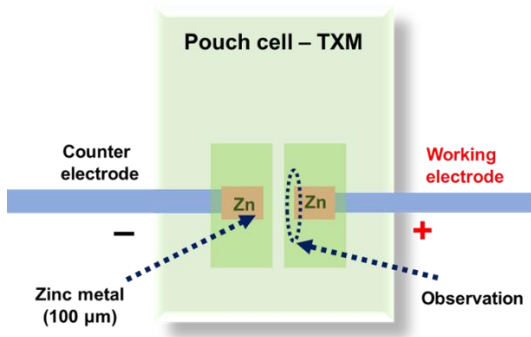

Device Type: Pouch Cell

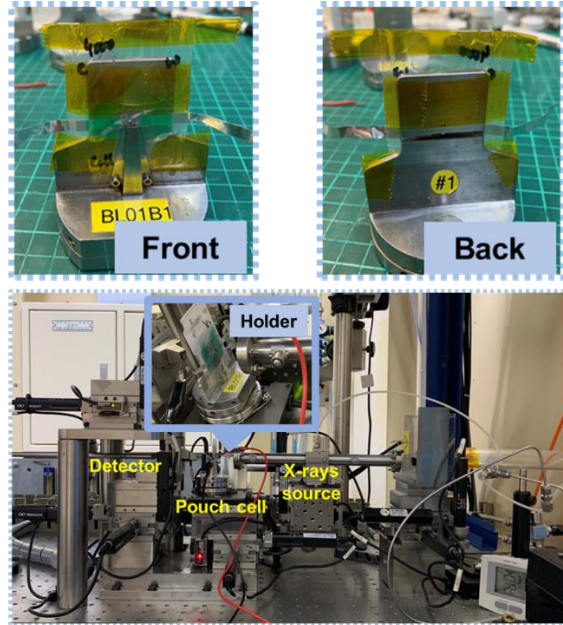

Figure S1. Experimental set-up for TXM.

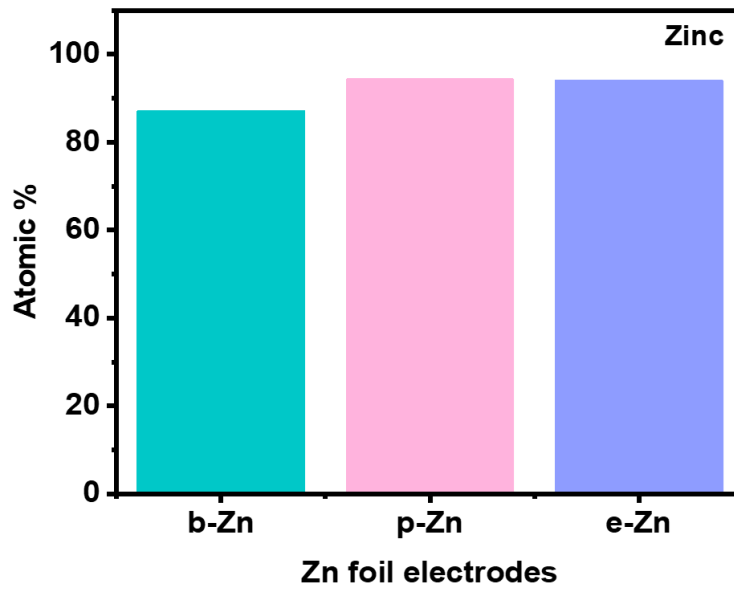

Figure S2. Comparative atomic % of zinc for b-Zn, e-Zn, and p-Zn.

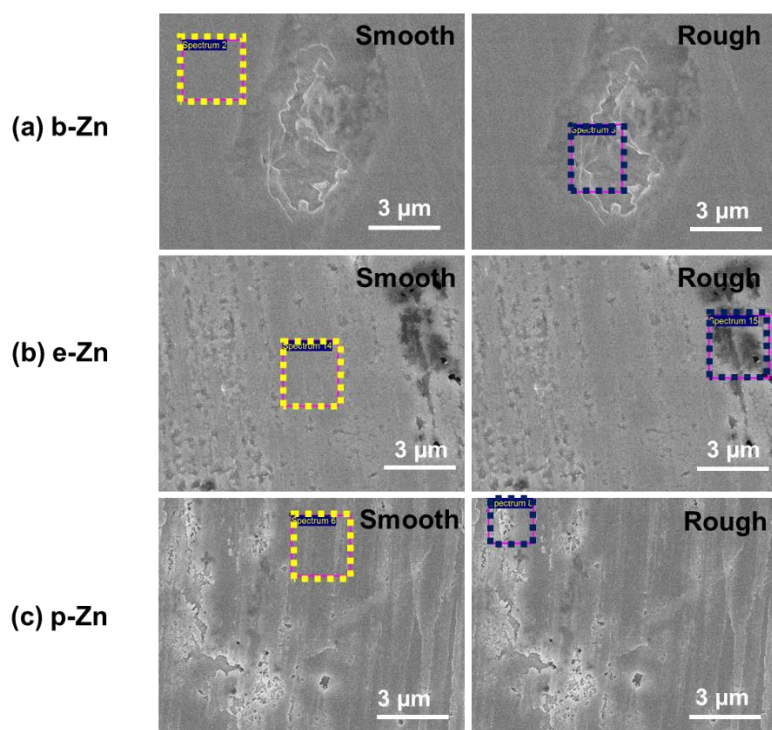

**Figure S3.** FESEM images of the various Zn foils: (a) b-Zn; (b) e-Zn; (c) p-Zn; for smooth surface, and rough surface, respectively.

**Table S2.** Comparative atomic % of bare Zn (b-Zn), polished Zn (p-Zn), and etched Zn (e-Zn) for O and Zn.

| Atomic %           | b-Zn  |       | p-Zn  |      | e-Zn  |      |
|--------------------|-------|-------|-------|------|-------|------|
|                    | Zn    | O     | Zn    | O    | Zn    | O    |
| <b>Smooth</b>      | 93.16 | 6.84  | 95.99 | 4.01 | 97.45 | 2.55 |
| <b>Rough</b>       | 82.91 | 17.09 | 92.56 | 7.44 | 92.42 | 7.58 |
| <b>Sum overall</b> | 87.11 | 12.89 | 94.35 | 5.65 | 94.04 | 5.96 |

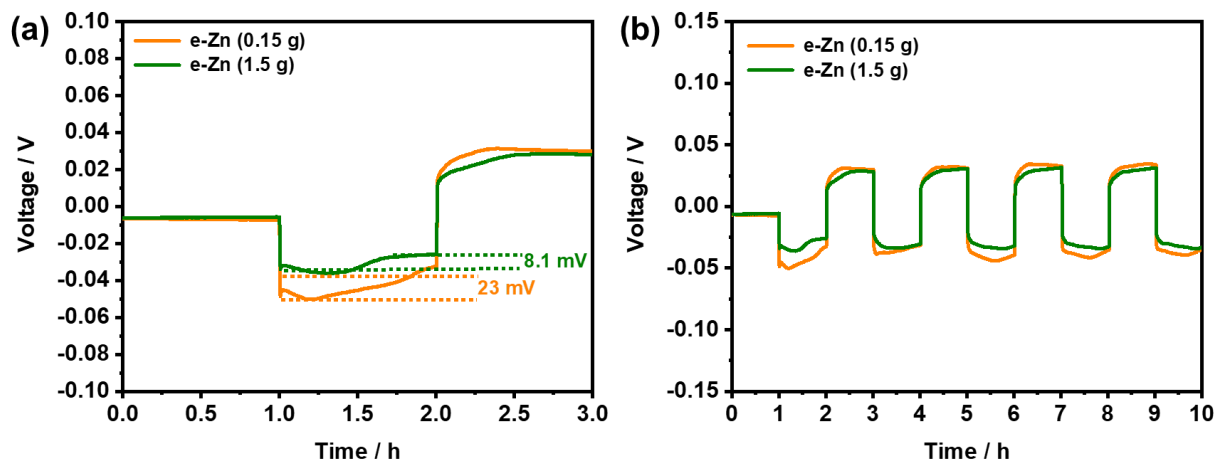

**Figure S4.** (a) The potential profiles of the two symmetric coin cells (e-Zn (0.15 g), e-Zn (1.5 g)) during the first plating and stripping cycle showing nucleation over-potential; (b) Electrochemical plating/stripping cycles of symmetric coin cells with the two Zn foil electrodes (e-Zn (0.15 g), e-Zn (1.5 g)) with a current density of  $0.1 \text{ mA cm}^{-2}$  for 1 h at room temperature.

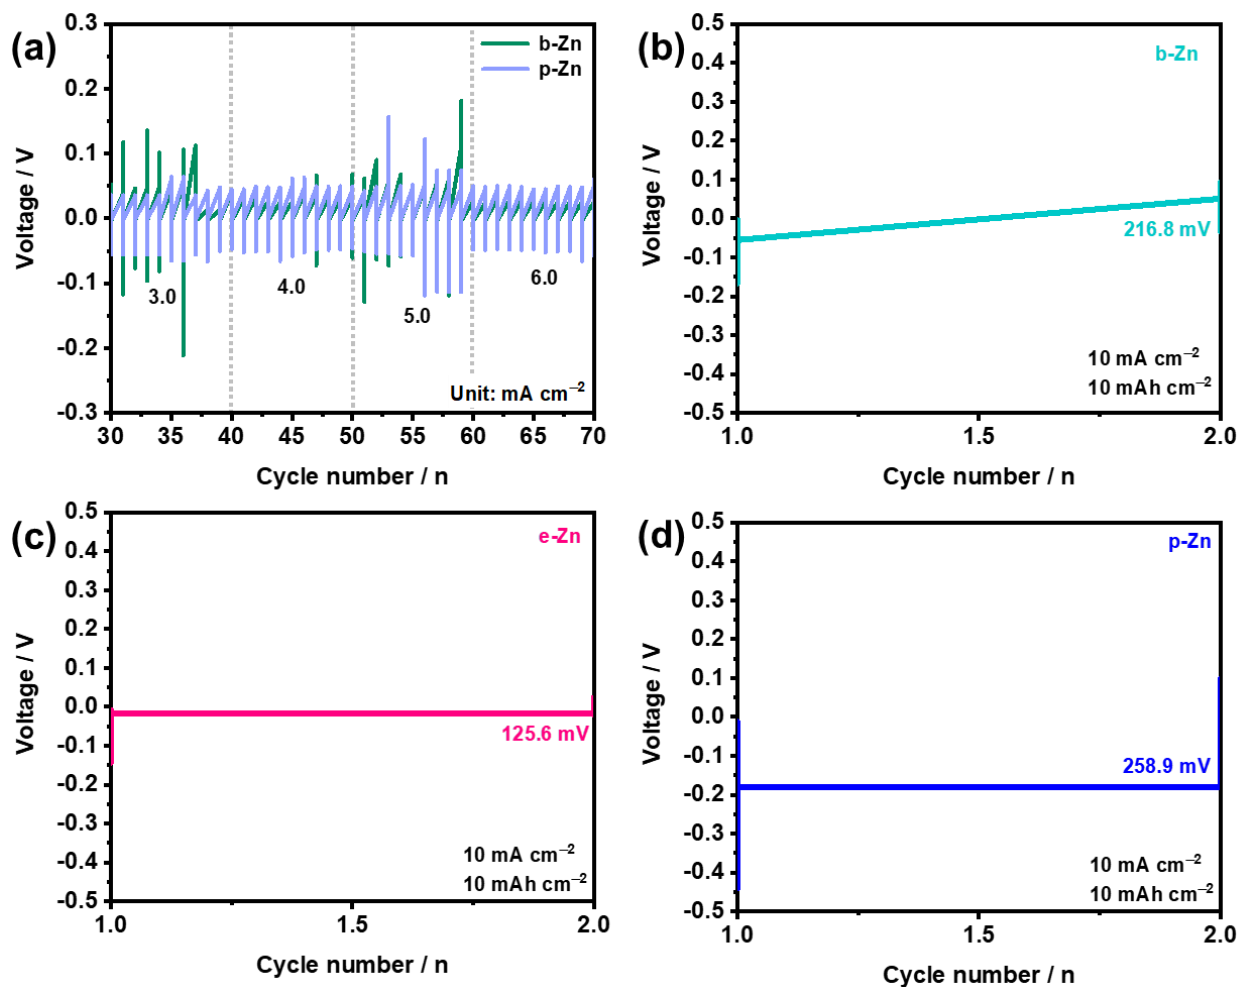

**Figure S5.** (a) Rate performances of b-Zn||b-Zn and p-Zn||p-Zn symmetric cell; (f) Potential profiles of the b-Zn||b-Zn, e-Zn||e-Zn, and p-Zn||p-Zn three symmetric coin cells during the initial plating/stripping cycle, illustrating nucleation overpotential at  $10 \text{ mA cm}^{-2}/10 \text{ mAh cm}^{-2}$ .

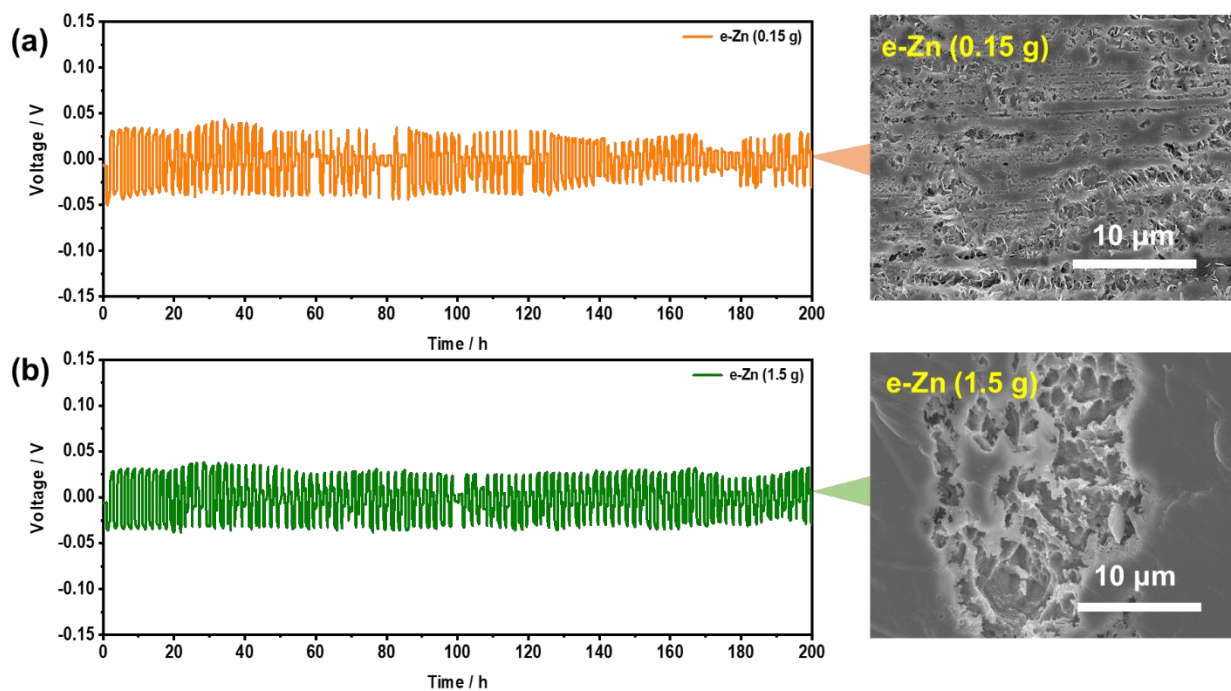

**Figure S6.** Galvanostatic charge/discharge curve under the current density of  $0.1 \text{ mA cm}^{-2}$  for (a) e-Zn (0.15 g) and (b) e-Zn (1.5 g).

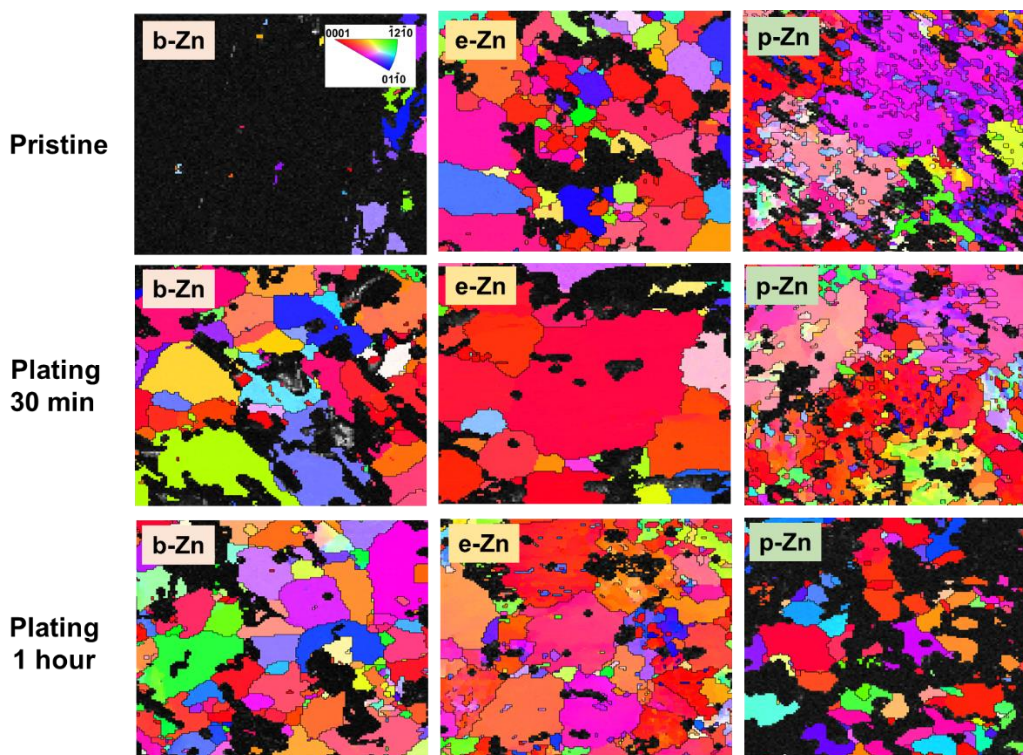

**Figure S7.** EBSD orientation maps for b-Zn, e-Zn, and p-Zn of pristine and after 30 min and 1 hour of plating. Inset is the inverse pole figures (IPF) triangle map, in which the red color represents the (002) crystallographic direction.

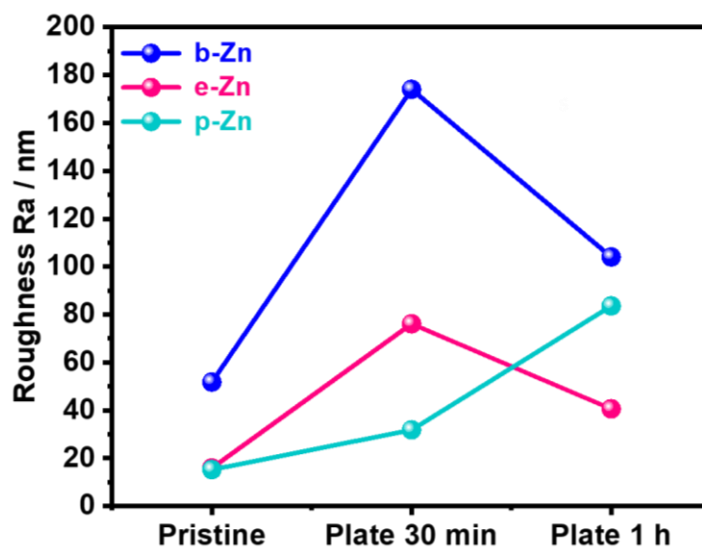

**Figure S8.** The roughness Ra values evolution of the three samples during the plating process.



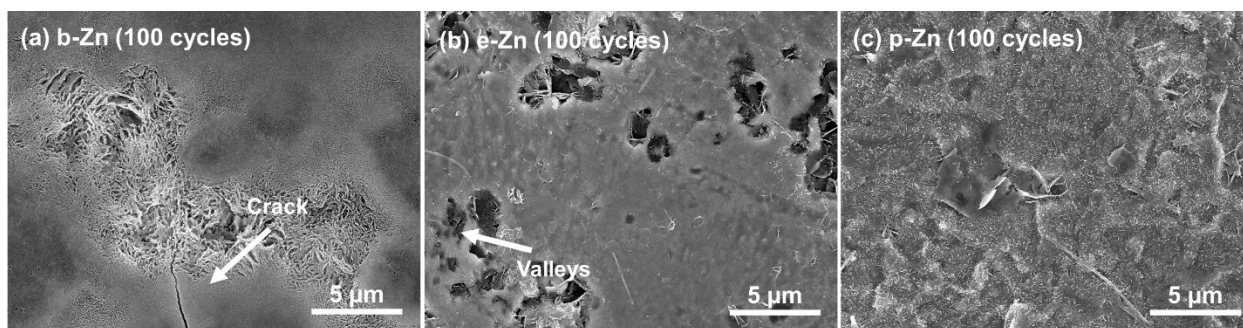

**Figure S9.** SEM images of (a) b-Zn; (b) e-Zn; and (c) p-Zn after 100 cycles at  $0.1 \text{ mA cm}^{-2}/0.1 \text{ mAh cm}^{-2}$ .

## References

- 1 Z. Zhang, S. Said, K. Smith, Y. S. Zhang, G. He, R. Jervis, P. R. Shearing, T. S. Miller and D. J. L. Brett, *J. Mater. Chem. A*, 2021, **9**, 15355–15362.
- 2 J. Li, K. Le and W. Wei, *J. Mater. Sci. Technol.*, 2022, **102**, 272–277.
- 3 P. He and J. Huang, *ACS Energy Lett.*, 2021, **6**, 1990–1995.
- 4 R. Zhu, Z. Xiong, H. Yang, T. Huang, S. Jeong, D. Kowalski, S. Kitano, Y. Aoki, H. Habazaki and C. Zhu, *Energy Storage Mater.*, 2022, **46**, 223–232.
- 5 H. Liu, J. Li, X. Zhang, X. Liu, Y. Yan, F. Chen, G. Zhang, and H. Duan, *Adv. Funct. Mater.*, 2021, **31**, 2106550.
- 6 J. Wang, Z. Cai, R. Xiao, Y. Ou, R. Zhan, Z. Yuan and Y. Sun, *ACS Appl. Mater. Interfaces*, 2020, **12**, 23028–23034.
- 7 W. Wang, G. Huang, Y. Wang, Z. Cao, L. Cavallo, M. N. Hedhili and H. N. Alshareef, *Adv. Energy Mater.*, 2022, **12**, 2102797.
- 8 W. Guo, Z. Cong, Z. Guo, C. Chang, X. Liang, Y. Liu, W. Hu and X. Pu, *Energy Storage Mater.*, 2020, **30**, 104–112.
- 9 C. Yuan, L. Yin, P. Du, Y. Yu, K. Zhang, X. Ren, X. Zhan and S. Gao, *Chem. Eng. J.*, 2022, **442**, 136231.
